# Supplementary material
Source: Springer Nature journal article supplement (https://www.springermedizin.de/resource/supplementary/12885_2013_5267_MOESM3_ESM.pdf/9465446)

**a**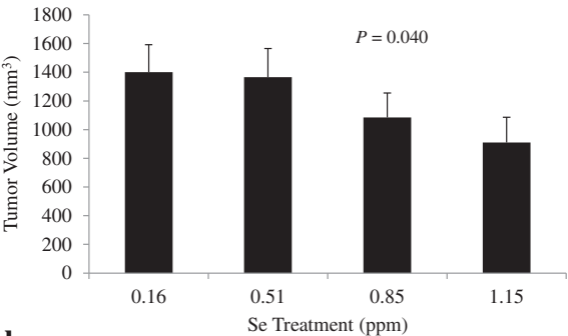**b**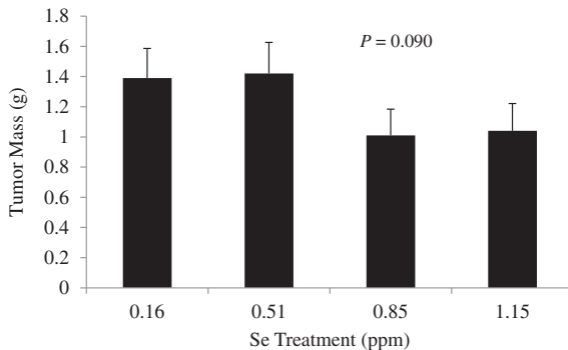

Supplement: MOESM3 [file 9465446]
